# Supplementary material for: Association between germline pathogenic variants in cancer‐predisposing genes and lymphoma risk
Source: PubMed Central journal article supplement — Cancer Sci. 2022 Sep 5;113(11):3972–9. doi: 10.1111/cas.15522 (PMC9633290; doi:10.1111/cas.15522), 2022-09-05
Supplement: CAS-113-3972-s001.pdf [file CAS-113-3972-s001.pdf]

**Figure S3. Association of germline pathogenic variants with each lymphoma risk based on different genes**

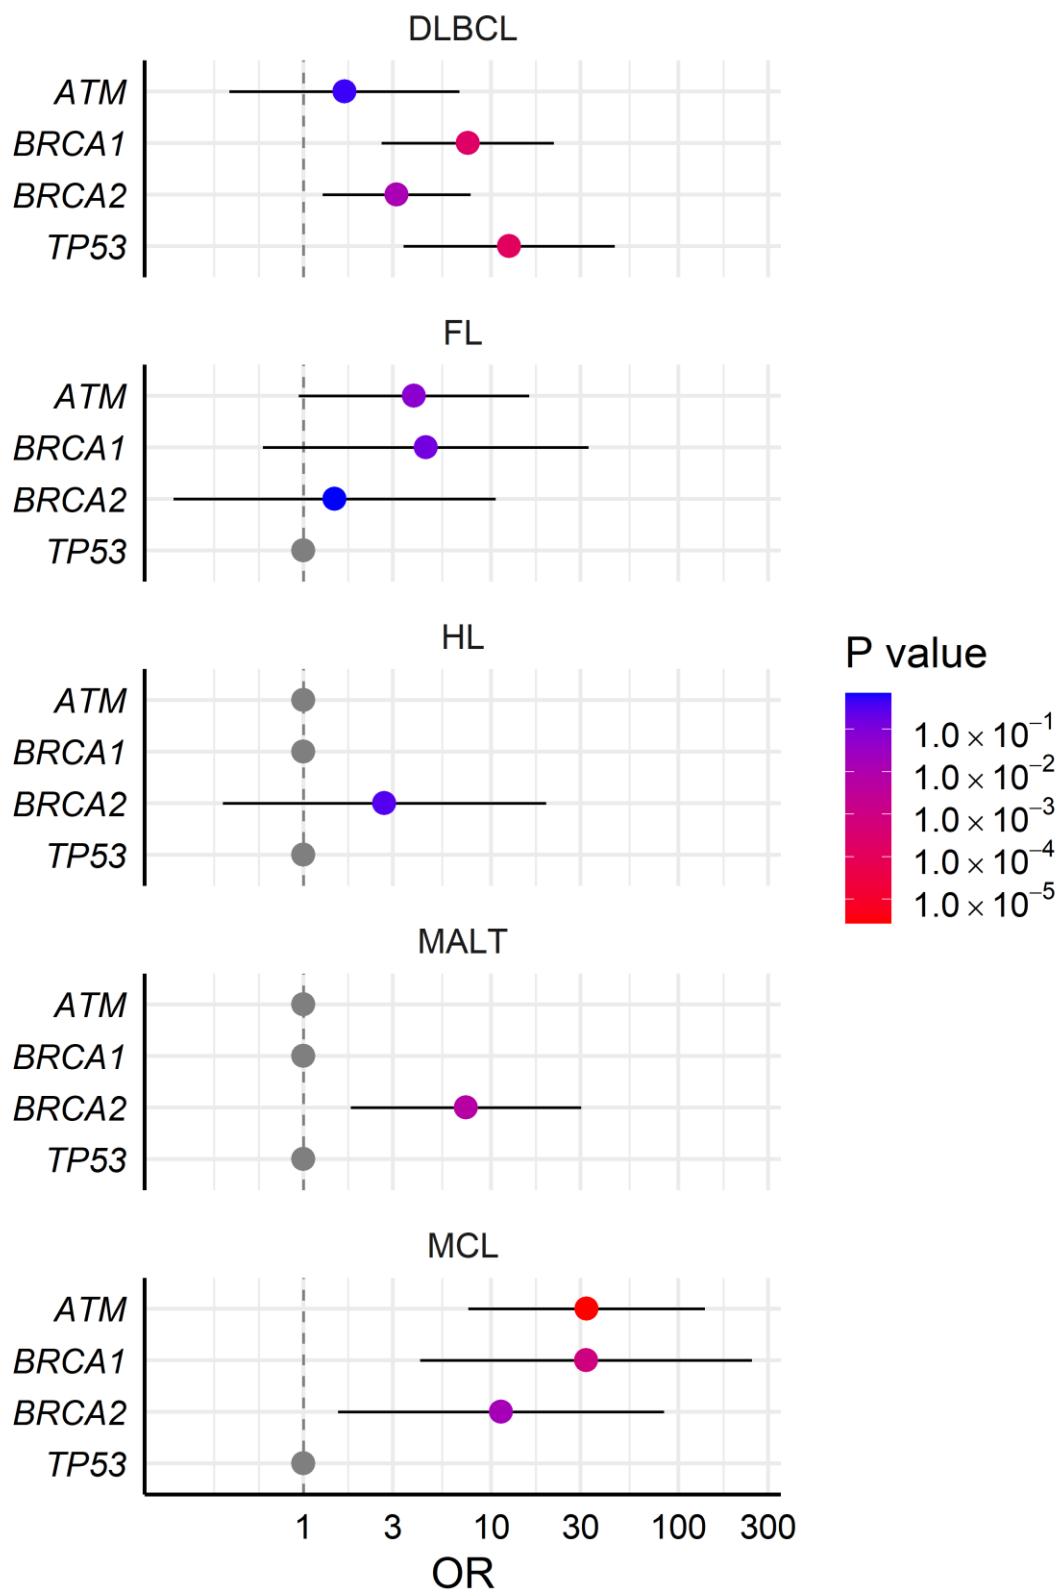

The associations between germline pathogenic variants and lymphoma risk based on different genes were

evaluated using a logistic regression model adjusted for age and sex. Error bars represent 95% CIs.

Abbreviations: CI, confidence interval; MCL, mantle cell lymphoma; OR, odds ratio.
