# Supplementary material for: Association between germline pathogenic variants in cancer‐predisposing genes and lymphoma risk
Source: PubMed Central journal article supplement — Cancer Sci. 2022 Sep 5;113(11):3972–9. doi: 10.1111/cas.15522 (PMC9633290; doi:10.1111/cas.15522), 2022-09-05
Supplement: CAS-113-3972-s002.pdf [file CAS-113-3972-s002.pdf]

**Figure S2. Comparison of the proportions of subtypes with that of population-based data**

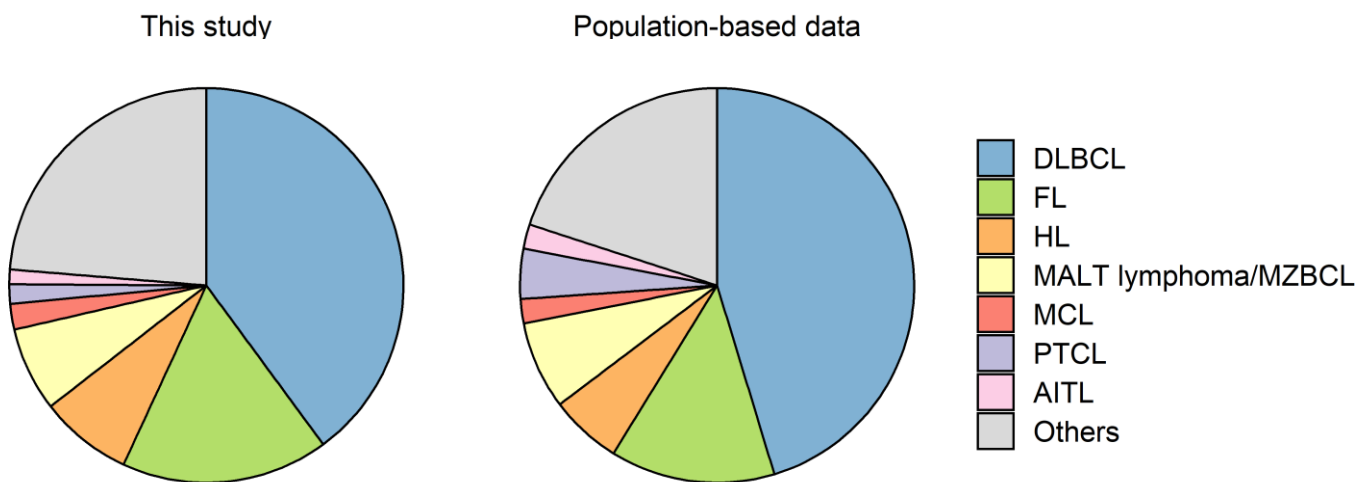

Population-based data were extracted from a previous study based on population-based cancer registry data in Japan.<sup>1</sup> MALT lymphoma/MZBCL indicates MALT lymphoma in this study, and indicates MZBCL in population-based data.

Abbreviations: AITL, angioimmunoblastic T-cell lymphoma; DLBCL, diffuse large B-cell lymphoma; FL, follicular lymphoma; HL, Hodgkin lymphoma; MALT lymphoma, extranodal marginal zone lymphoma of mucosa-associated lymphoid tissue; MCL, mantle cell lymphoma; MZBCL, marginal zone B-cell lymphoma; MCL, mantle cell lymphoma; PTCL, peripheral T-cell lymphoma.

1. Chihara D, Ito H, Matsuda T, et al. Differences in incidence and trends of haematological malignancies in Japan and the United States. *Br J Haematol.* 2014; 164: 536-545.
