# Supplementary material for: Association between germline pathogenic variants in cancer‐predisposing genes and lymphoma risk
Source: PubMed Central journal article supplement — Cancer Sci. 2022 Sep 5;113(11):3972–9. doi: 10.1111/cas.15522 (PMC9633290; doi:10.1111/cas.15522), 2022-09-05
Supplement: CAS-113-3972-s003.pdf [file CAS-113-3972-s003.pdf]

**Table S1. Sequencing coverages in 27 cancer-predisposing genes**

| Gene          | Targeted region (base pair) | <sup>a</sup> Coverage (%) |
|---------------|-----------------------------|---------------------------|
| <i>APC</i>    | 8,592                       | 99.93                     |
| <i>ATM</i>    | 9,419                       | 99.54                     |
| <i>BARD1</i>  | 2,378                       | 99.94                     |
| <i>BMPR1A</i> | 1,643                       | 99.94                     |
| <i>BRCA1</i>  | 5,750                       | 99.96                     |
| <i>BRCA2</i>  | 10,361                      | 99.60                     |
| <i>BRIP1</i>  | 3,826                       | 99.95                     |
| <i>CDH1</i>   | 2,713                       | 99.95                     |
| <i>CDK4</i>   | 940                         | 99.96                     |
| <i>CDKN2A</i> | 731                         | 99.94                     |
| <i>CHEK2</i>  | 1,821                       | 99.57                     |
| <i>EPCAM</i>  | 981                         | 99.58                     |
| <i>HOXB13</i> | 863                         | 99.92                     |
| <i>MLH1</i>   | 2,347                       | 99.95                     |
| <i>MSH2</i>   | 2,869                       | 99.54                     |
| <i>MSH6</i>   | 4,123                       | 99.88                     |
| <i>MUTYH</i>  | 1,705                       | 99.93                     |
| <i>NBN</i>    | 2,329                       | 99.45                     |
| <i>NF1</i>    | 8,813                       | 99.75                     |
| <i>PALB2</i>  | 3,613                       | 99.97                     |
| <i>PMS2</i>   | 1,024                       | 99.96                     |
| <i>PTEN</i>   | 1,248                       | 99.92                     |
| <i>RAD51C</i> | 1,171                       | 99.96                     |
| <i>RAD51D</i> | 1,210                       | 99.94                     |
| <i>SMAD4</i>  | 1,703                       | 99.91                     |
| <i>STK11</i>  | 1,338                       | 99.99                     |
| <i>TP53</i>   | 1,311                       | 99.97                     |

<sup>a</sup>Percentages of the targeted region covered with 20 or more sequencing reads among all subjects are shown.
