# Supplementary material for: Association between germline pathogenic variants in cancer‐predisposing genes and lymphoma risk
Source: PubMed Central journal article supplement — Cancer Sci. 2022 Sep 5;113(11):3972–9. doi: 10.1111/cas.15522 (PMC9633290; doi:10.1111/cas.15522), 2022-09-05
Supplement: CAS-113-3972-s004.pdf [file CAS-113-3972-s004.pdf]

**Table S4. All results of gene-based association using germline pathogenic variants**

|               | No. of pathogenic variant carrier (%) |        |                      |        | <sup>a</sup> Model 1 |       |   |        |                       | <sup>b</sup> Model 2 |       |   |        |                       |
|---------------|---------------------------------------|--------|----------------------|--------|----------------------|-------|---|--------|-----------------------|----------------------|-------|---|--------|-----------------------|
|               | Lymphoma (N = 1,982)                  |        | Control (N = 37,592) |        | OR (95% CI)          |       |   |        | P value               | OR (95% CI)          |       |   |        | P value               |
| <i>APC</i>    | 0                                     | (0.00) | 3                    | (0.01) | NA                   | NA    | – | NA     | NA                    | NA                   | NA    | – | NA     | NA                    |
| <i>ATM</i>    | 8                                     | (0.40) | 59                   | (0.18) | 2.58                 | (1.23 | – | 5.40)  | $1.21 \times 10^{-2}$ | 2.63                 | (1.25 | – | 5.51)  | $1.06 \times 10^{-2}$ |
| <i>BARD1</i>  | 1                                     | (0.05) | 19                   | (0.05) | 1.00                 | (0.13 | – | 7.46)  | 0.999                 | 1.03                 | (0.14 | – | 7.74)  | 0.974                 |
| <i>BMPR1A</i> | 0                                     | (0.00) | 0                    | (0.00) | NA                   | NA    | – | NA     | NA                    | NA                   | NA    | – | NA     | NA                    |
| <i>BRCA1</i>  | 8                                     | (0.40) | 26                   | (0.07) | 5.86                 | (2.65 | – | 12.95) | $1.27 \times 10^{-5}$ | 5.88                 | (2.65 | – | 13.02) | $1.27 \times 10^{-5}$ |
| <i>BRCA2</i>  | 12                                    | (0.61) | 79                   | (0.21) | 2.89                 | (1.57 | – | 5.32)  | $6.29 \times 10^{-4}$ | 2.94                 | (1.60 | – | 5.42)  | $5.25 \times 10^{-4}$ |
| <i>BRIP1</i>  | 0                                     | (0.00) | 50                   | (0.13) | NA                   | NA    | – | NA     | NA                    | NA                   | NA    | – | NA     | NA                    |
| <i>CDH1</i>   | 0                                     | (0.00) | 5                    | (0.01) | NA                   | NA    | – | NA     | NA                    | NA                   | NA    | – | NA     | NA                    |
| <i>CDK4</i>   | 0                                     | (0.00) | 1                    | (0.00) | NA                   | NA    | – | NA     | NA                    | NA                   | NA    | – | NA     | NA                    |
| <i>CDKN2A</i> | 0                                     | (0.00) | 3                    | (0.01) | NA                   | NA    | – | NA     | NA                    | NA                   | NA    | – | NA     | NA                    |
| <i>CHEK2</i>  | 1                                     | (0.05) | 35                   | (0.09) | 0.54                 | (0.07 | – | 3.96)  | 0.546                 | 0.55                 | (0.08 | – | 4.04)  | 0.559                 |
| <i>EPCAM</i>  | 1                                     | (0.05) | 8                    | (0.02) | 2.37                 | (0.30 | – | 18.97) | 0.416                 | 2.66                 | (0.33 | – | 21.36) | 0.359                 |
| <i>HOXB13</i> | 0                                     | (0.00) | 9                    | (0.02) | NA                   | NA    | – | NA     | NA                    | NA                   | NA    | – | NA     | NA                    |
| <i>MLH1</i>   | 0                                     | (0.00) | 2                    | (0.01) | NA                   | NA    | – | NA     | NA                    | NA                   | NA    | – | NA     | NA                    |
| <i>MSH2</i>   | 1                                     | (0.05) | 3                    | (0.01) | 6.33                 | (0.66 | – | 60.84) | 0.110                 | 7.00                 | (0.72 | – | 67.54) | 0.093                 |

(continued)

(continued)

|                           |    |        |     |        |      |       |   |        |                       |      |       |   |        |                       |
|---------------------------|----|--------|-----|--------|------|-------|---|--------|-----------------------|------|-------|---|--------|-----------------------|
| <i>MSH6</i>               | 0  | (0.00) | 16  | (0.04) | NA   | NA    | – | NA     | NA                    | NA   | NA    | – | NA     | NA                    |
| <sup>c</sup> <i>MUTYH</i> | 0  | (0.00) | 0   | (0.00) | NA   | NA    | – | NA     | NA                    | NA   | NA    | – | NA     | NA                    |
| <i>NBN</i>                | 1  | (0.05) | 50  | (0.13) | 0.38 | (0.05 | – | 2.75)  | 0.337                 | 0.39 | (0.05 | – | 2.80)  | 0.346                 |
| <i>NF1</i>                | 0  | (0.00) | 17  | (0.05) | NA   | NA    | – | NA     | NA                    | NA   | NA    | – | NA     | NA                    |
| <i>PALB2</i>              | 2  | (0.10) | 20  | (0.05) | 1.90 | (0.44 | – | 8.12)  | 0.388                 | 1.98 | (0.46 | – | 8.47)  | 0.359                 |
| <i>PMS2</i>               | 0  | (0.00) | 17  | (0.05) | NA   | NA    | – | NA     | NA                    | NA   | NA    | – | NA     | NA                    |
| <i>PTEN</i>               | 0  | (0.00) | 8   | (0.02) | NA   | NA    | – | NA     | NA                    | NA   | NA    | – | NA     | NA                    |
| <i>RAD51C</i>             | 0  | (0.00) | 14  | (0.04) | NA   | NA    | – | NA     | NA                    | NA   | NA    | – | NA     | NA                    |
| <i>RAD51D</i>             | 11 | (0.56) | 122 | (0.33) | 1.71 | (0.92 | – | 3.18)  | 0.088                 | 1.72 | (0.92 | – | 3.19)  | 0.088                 |
| <i>SMAD4</i>              | 0  | (0.00) | 3   | (0.01) | NA   | NA    | – | NA     | NA                    | NA   | NA    | – | NA     | NA                    |
| <i>STK11</i>              | 0  | (0.00) | 2   | (0.01) | NA   | NA    | – | NA     | NA                    | NA   | NA    | – | NA     | NA                    |
| <i>TP53</i>               | 3  | (0.15) | 10  | (0.03) | 5.70 | (1.57 | – | 20.72) | $8.25 \times 10^{-3}$ | 5.22 | (1.43 | – | 19.02) | $1.23 \times 10^{-2}$ |

<sup>a</sup>Model 1: unadjusted in a logistic regression model.

<sup>b</sup>Model 2: adjusted by sex and age at entry in a logistic regression model

<sup>c</sup>Germline pathogenic variant status was defined as an individual with biallelic pathogenic variants.

Abbreviations: CI, confidence interval; NA, not available; OR, odds ratio.
