# Supplementary material for: Association between germline pathogenic variants in cancer‐predisposing genes and lymphoma risk
Source: PubMed Central journal article supplement — Cancer Sci. 2022 Sep 5;113(11):3972–9. doi: 10.1111/cas.15522 (PMC9633290; doi:10.1111/cas.15522), 2022-09-05
Supplement: CAS-113-3972-s005.pdf [file CAS-113-3972-s005.pdf]

**Table S5. Germline pathogenic variants in *BRCA1/2* among lymphoma patients and comparison with pathogenic variants in *BRCA1/2* found in other cancer types from our previous study**

| Chr | Pos        | Ref   | Alt | HGVS.c             | HGVS.p       | Gene         | Alternative allele                | Alternative allele          | Cancer type         |
|-----|------------|-------|-----|--------------------|--------------|--------------|-----------------------------------|-----------------------------|---------------------|
|     |            |       |     |                    |              |              | frequency<br>in lymphoma case (%) | frequency<br>in control (%) |                     |
| 13  | 32,906,627 | GC    | G   | c.1013delC         | p.Ala338fs   | <i>BRCA2</i> | 0.02527                           | 0.00000                     | L                   |
| 13  | 32,907,420 | GA    | G   | c.1813delA         | p.Ile605fs   | <i>BRCA2</i> | 0.07568                           | 0.00399                     | L, FB, G, O, Pa, Pr |
| 13  | 32,912,089 | CTG   | C   | c.3599_3600delIGT  | p.Cys1200fs  | <i>BRCA2</i> | 0.02523                           | 0.00266                     | L, Pr               |
| 13  | 32,913,391 | CTT   | C   | c.4903_4904delITT  | p.Leu1635fs  | <i>BRCA2</i> | 0.02523                           | 0.00000                     | L, E, FB, G         |
| 13  | 32,914,065 | CAATT | C   | c.5576_5579delTTAA | p.Ile1859fs  | <i>BRCA2</i> | 0.02523                           | 0.00532                     | L, FB, G, O, Pa, Pr |
| 13  | 32,918,775 | A     | T   | c.6922A>T          | p.Lys2308*   | <i>BRCA2</i> | 0.02599                           | 0.00134                     | L, FB, O, Pr        |
| 13  | 32,918,778 | AG    | A   | c.6926delG         | p.Ser2309fs  | <i>BRCA2</i> | 0.02599                           | 0.00000                     | L                   |
| 13  | 32,920,978 | C     | T   | c.6952C>T          | p.Arg2318*   | <i>BRCA2</i> | 0.02523                           | 0.01330                     | L, FB, G, O, Pa, Pr |
| 13  | 32,972,800 | C     | T   | c.10150C>T         | p.Arg3384*   | <i>BRCA2</i> | 0.05045                           | 0.01197                     | L                   |
| 17  | 41,197,729 | T     | C   | c.5621A>G          | p.Tyr1874Cys | <i>BRCA1</i> | 0.02523                           | 0.00000                     | L, B, FB            |
| 17  | 41,215,389 | C     | A   | c.5217G>T          | p.Trp1739Cys | <i>BRCA1</i> | 0.02523                           | 0.00133                     | L                   |
| 17  | 41,243,024 | ACT   | A   | c.4120_4121delAG   | p.Ser1374fs  | <i>BRCA1</i> | 0.02523                           | 0.00000                     | L, FB, O            |
| 17  | 41,244,004 | G     | A   | c.3544C>T          | p.Gln1182*   | <i>BRCA1</i> | 0.02523                           | 0.00133                     | L, FB, G            |
| 17  | 41,244,085 | C     | CT  | c.3462dupA         | p.Asp1155fs  | <i>BRCA1</i> | 0.02523                           | 0.00000                     | L, G                |
| 17  | 41,245,157 | TTC   | T   | c.2389_2390delIGA  | p.Glu797fs   | <i>BRCA1</i> | 0.05045                           | 0.00266                     | L, B, FB, G, O      |
| 17  | 41,258,497 | A     | T   | c.188T>A           | p.Leu63*     | <i>BRCA1</i> | 0.02523                           | 0.01064                     | L, B, FB, G, O      |

Sixteen germline pathogenic variants of *BRCA1/2* found in this study were compared with those observed in biliary duct (*BRCA1*), female breast (*BRCA1/2*), male breast (*BRCA2*), esophageal (*BRCA2*), gastric (*BRCA1/2*), ovarian (*BRCA1/2*), pancreatic (*BRCA1/2*), and prostate cancer (*BRCA2*) carriers from our previous study.<sup>1</sup>

Abbreviations: B, Biliary duct cancer; E, Esophageal cancer; FB, Female Breast cancer; G, Gastric cancer; L, Lymphoma; O, Ovarian cancer; Pa, Pancreatic cancer; Pr, Prostate cancer.

1. Momozawa Y, Sasai R, Usui Y, et al. Expansion of Cancer Risk Profile for *BRCA1* and *BRCA2* Pathogenic Variants. *JAMA Oncol.* 2022; 8: 871-878.
