# Supplementary material for: Association between germline pathogenic variants in cancer‐predisposing genes and lymphoma risk
Source: PubMed Central journal article supplement — Cancer Sci. 2022 Sep 5;113(11):3972–9. doi: 10.1111/cas.15522 (PMC9633290; doi:10.1111/cas.15522), 2022-09-05
Supplement: CAS-113-3972-s006.pdf [file CAS-113-3972-s006.pdf]

**Table S2. Annotation of germline variants in 27 cancer-predisposing genes defined by ClinVar and SnpEff**

|                              |                        | <sup>a</sup> SnpEff version 4.3t |                  |                 | Total |
|------------------------------|------------------------|----------------------------------|------------------|-----------------|-------|
|                              |                        | HIGH                             | MODERATE         | LOW+MODIFIER    |       |
| ClinVar<br>(ver. 2022-03-06) | Pathogenic             | <b><u>157</u></b>                | <b><u>28</u></b> | <b><u>1</u></b> | 186   |
|                              | Benign                 | 0                                | 105              | 763             | 868   |
|                              | Uncertain significance | <b><u>23</u></b>                 | 1,992            | 117             | 2,132 |
|                              | Not registered         | <b><u>100</u></b>                | 1,145            | 419             | 1,664 |
| Total                        |                        | 280                              | 3,270            | 1,300           | 4,850 |

We defined “pathogenic variants” in this study as either loss-of-function variants determined by the SnpEff ver 4.3t,<sup>1</sup> or pathogenic/likely pathogenic variants identified by ClinVar (ver. 2022-03-06).<sup>2</sup> Variants that are considered pathogenic in this study are highlighted in boldface and underlined.

<sup>a</sup>Variants impacts were classified into "HIGH", "MODERATE", and "LOW+MODIFIER", accordance to SnpEff.

HIGH; the variants are assumed to have high impact in the protein, probably causing protein truncation, loss of function or triggering nonsense mediated decay. MODERATE; non-disruptive variants that might change protein effectiveness. LOW; the variants assumed to be mostly harmless or unlikely to change protein behavior. MODIFIER; usually non-coding variants or variants affecting non-coding genes, where predictions are difficult, or there is no evidence of impact.

1. Cingolani P, Platts A, Wang IL, et al. A program for annotating and predicting the effects of single nucleotide polymorphisms, SnpEff: SNPs in the genome of

*Drosophila melanogaster* strain w1118; iso-2; iso-3. *Fly (Austin)*. 2012; 6: 80-92.

2. Landrum MJ, Lee JM, Benson M, et al. ClinVar: public archive of interpretations of clinically relevant variants. *Nucleic Acids Res*. 2016; 44: D862-868.
