# Supplementary material for: Association between germline pathogenic variants in cancer‐predisposing genes and lymphoma risk
Source: PubMed Central journal article supplement — Cancer Sci. 2022 Sep 5;113(11):3972–9. doi: 10.1111/cas.15522 (PMC9633290; doi:10.1111/cas.15522), 2022-09-05
Supplement: CAS-113-3972-s007.pdf [file CAS-113-3972-s007.pdf]

**Table S3. All germline pathogenic variants**

| Chr | Pos        | Ref | Alt   | Gene         | HGVS.c             | HGVS.p      | Alternative allele frequency in lymphoma case (%) | Alternative allele frequency in control (%) |
|-----|------------|-----|-------|--------------|--------------------|-------------|---------------------------------------------------|---------------------------------------------|
| 1   | 45,795,004 | G   | GTGCA | <i>MUTYH</i> | c.1611_1614dupTGCA | p.His539fs  | 0.00000                                           | 0.00133                                     |
| 1   | 45,795,049 | G   | A     | <i>MUTYH</i> | c.1570C>T          | p.Gln524*   | 0.00000                                           | 0.00133                                     |
| 1   | 45,795,103 | T   | A     | <i>MUTYH</i> | c.1516A>T          | p.Lys506*   | 0.00000                                           | 0.00133                                     |
| 1   | 45,796,205 | G   | A     | <i>MUTYH</i> | c.1492C>T          | p.Gln498*   | 0.00000                                           | 0.00133                                     |
| 1   | 45,797,348 | G   | A     | <i>MUTYH</i> | c.1162C>T          | p.Gln388*   | 0.00000                                           | 0.00133                                     |
| 1   | 45,797,414 | C   | A     | <i>MUTYH</i> | c.1096G>T          | p.Glu366*   | 0.00000                                           | 0.00133                                     |
| 1   | 45,797,914 | C   | T     | <i>MUTYH</i> | c.848G>A           | p.Gly283Glu | 0.02523                                           | 0.03591                                     |
| 1   | 45,797,951 | G   | A     | <i>MUTYH</i> | c.811C>T           | p.Arg271Trp | 0.00000                                           | 0.00133                                     |
| 1   | 45,797,972 | G   | A     | <i>MUTYH</i> | c.790C>T           | p.Gln264*   | 0.02523                                           | 0.00266                                     |
| 1   | 45,798,063 | C   | T     | <i>MUTYH</i> | c.779G>A           | p.Trp260*   | 0.02523                                           | 0.00266                                     |
| 1   | 45,798,118 | G   | A     | <i>MUTYH</i> | c.724C>T           | p.Arg242Cys | 0.00000                                           | 0.00266                                     |
| 1   | 45,798,627 | C   | T     | <i>MUTYH</i> | c.458G>A           | p.Trp153*   | 0.00000                                           | 0.01064                                     |
| 1   | 45,798,839 | C   | T     | <i>MUTYH</i> | c.383G>A           | p.Trp128*   | 0.00000                                           | 0.00133                                     |
| 1   | 45,799,108 | G   | A     | <i>MUTYH</i> | c.316C>T           | p.Arg106Trp | 0.00000                                           | 0.00133                                     |
| 1   | 45,799,163 | T   | TA    | <i>MUTYH</i> | c.260dupT          | p.Ala88fs   | 0.00000                                           | 0.00133                                     |
| 1   | 45,799,166 | GTC | G     | <i>MUTYH</i> | c.256_257delGA     | p.Asp86fs   | 0.00000                                           | 0.00133                                     |
| 1   | 45,800,111 | G   | A     | <i>MUTYH</i> | c.109C>T           | p.Gln37*    | 0.00000                                           | 0.00133                                     |
| 1   | 45,800,165 | G   | A     | <i>MUTYH</i> | c.55C>T            | p.Arg19*    | 0.00000                                           | 0.00931                                     |

(continued)

(continued)

|    |             |       |    |              |                    |             |         |         |
|----|-------------|-------|----|--------------|--------------------|-------------|---------|---------|
| 1  | 45,805,889  | AC    | A  | <i>MUTYH</i> | c.36+1delG         |             | 0.00000 | 0.00133 |
| 1  | 45,805,890  | C     | G  | <i>MUTYH</i> | c.36+1G>C          |             | 0.00000 | 0.00133 |
| 1  | 45,805,925  | A     | G  | <i>MUTYH</i> | c.2T>C             | p.Met1?     | 0.00000 | 0.00133 |
| 10 | 89,692,767  | CAG   | C  | <i>PTEN</i>  | c.254-2_254-1delAG |             | 0.00000 | 0.00133 |
| 10 | 89,692,885  | C     | CT | <i>PTEN</i>  | c.370dupT          | p.Cys124fs  | 0.00000 | 0.00133 |
| 10 | 89,692,886  | T     | C  | <i>PTEN</i>  | c.370T>C           | p.Cys124Arg | 0.00000 | 0.00133 |
| 10 | 89,692,904  | C     | T  | <i>PTEN</i>  | c.388C>T           | p.Arg130*   | 0.00000 | 0.00133 |
| 10 | 89,692,980  | A     | G  | <i>PTEN</i>  | c.464A>G           | p.Tyr155Cys | 0.00000 | 0.00133 |
| 10 | 89,711,874  | G     | A  | <i>PTEN</i>  | c.493-1G>A         |             | 0.00000 | 0.00133 |
| 10 | 89,717,712  | C     | T  | <i>PTEN</i>  | c.737C>T           | p.Pro246Leu | 0.00000 | 0.00133 |
| 10 | 89,720,808  | T     | G  | <i>PTEN</i>  | c.959T>G           | p.Leu320*   | 0.00000 | 0.00133 |
| 11 | 108,098,533 | C     | T  | <i>ATM</i>   | c.103C>T           | p.Arg35*    | 0.02591 | 0.00000 |
| 11 | 108,099,905 | AT    | A  | <i>ATM</i>   | c.191delT          | p.Leu64fs   | 0.00000 | 0.00133 |
| 11 | 108,099,987 | AG    | A  | <i>ATM</i>   | c.270delG          | p.Arg90fs   | 0.00000 | 0.00133 |
| 11 | 108,106,510 | ATTCT | A  | <i>ATM</i>   | c.450_453delTTCT   | p.Ser151fs  | 0.00000 | 0.00133 |
| 11 | 108,114,768 | CA    | C  | <i>ATM</i>   | c.588delA          | p.Gly197fs  | 0.00000 | 0.00133 |
| 11 | 108,115,594 | C     | T  | <i>ATM</i>   | c.742C>T           | p.Arg248*   | 0.00000 | 0.00133 |
| 11 | 108,115,681 | G     | T  | <i>ATM</i>   | c.829G>T           | p.Glu277*   | 0.00000 | 0.00133 |
| 11 | 108,119,714 | CAA   | C  | <i>ATM</i>   | c.1122_1123delAA   | p.Glu376fs  | 0.00000 | 0.00133 |
| 11 | 108,119,831 | T     | C  | <i>ATM</i>   | c.1235+2T>C        |             | 0.00000 | 0.00133 |
| 11 | 108,121,448 | TA    | T  | <i>ATM</i>   | c.1258delA         | p.Ile420fs  | 0.00000 | 0.00133 |
| 11 | 108,121,536 | TGG   | T  | <i>ATM</i>   | c.1347_1348delGG   | p.Glu450fs  | 0.00000 | 0.00133 |
| 11 | 108,124,573 | C     | G  | <i>ATM</i>   | c.1931C>G          | p.Ser644*   | 0.00000 | 0.00266 |
| 11 | 108,126,954 | GA    | G  | <i>ATM</i>   | c.2140delA         | p.Thr714fs  | 0.00000 | 0.00133 |

(continued)

(continued)

|    |             |              |           |     |                          |             |         |         |
|----|-------------|--------------|-----------|-----|--------------------------|-------------|---------|---------|
| 11 | 108,137,984 | T            | TC        | ATM | c.2554dupC               | p.Gln852fs  | 0.00000 | 0.00133 |
| 11 | 108,137,985 | C            | T         | ATM | c.2554C>T                | p.Gln852*   | 0.00000 | 0.00133 |
| 11 | 108,138,070 | G            | T         | ATM | c.2638+1G>T              |             | 0.00000 | 0.00133 |
| 11 | 108,139,220 | GT           | G         | ATM | c.2723delT               | p.Val908fs  | 0.00000 | 0.00133 |
| 11 | 108,141,829 | C            | G         | ATM | c.2877C>G                | p.Tyr959*   | 0.02523 | 0.00000 |
| 11 | 108,142,134 | G            | T         | ATM | c.3077+1G>T              |             | 0.00000 | 0.00133 |
| 11 | 108,153,436 | G            | A         | ATM | c.3577-1G>A              |             | 0.00000 | 0.00133 |
| 11 | 108,155,125 | TG           | T         | ATM | c.3921delG               | p.Met1308fs | 0.00000 | 0.00133 |
| 11 | 108,155,202 | T            | C         | ATM | c.3993+2T>C              |             | 0.00000 | 0.00665 |
| 11 | 108,164,200 | T            | A         | ATM | c.4772T>A                | p.Leu1591*  | 0.00000 | 0.00133 |
| 11 | 108,164,206 | T            | A         | ATM | c.4776+2T>A              |             | 0.05045 | 0.00399 |
| 11 | 108,165,673 | CAGTA        | C         | ATM | c.4800_4803delAAGT       | p.Ser1601fs | 0.02523 | 0.00000 |
| 11 | 108,165,754 | A            | ATCAGATGG | ATM | c.4879_4886dupCAGATGGT   | p.Asp1630fs | 0.00000 | 0.00133 |
| 11 | 108,170,605 | G            | T         | ATM | c.5170G>T                | p.Glu1724*  | 0.02585 | 0.00000 |
| 11 | 108,172,385 | C            | T         | ATM | c.5188C>T                | p.Arg1730*  | 0.00000 | 0.00266 |
| 11 | 108,196,885 | AG           | A         | ATM | c.6910delG               | p.Glu2304fs | 0.00000 | 0.00133 |
| 11 | 108,196,926 | AAG          | A         | ATM | c.6951_6952delGA         | p.Lys2318fs | 0.00000 | 0.00133 |
| 11 | 108,200,988 | T            | TG        | ATM | c.7356dupG               | p.Arg2453fs | 0.00000 | 0.00133 |
| 11 | 108,201,089 | C            | T         | ATM | c.7456C>T                | p.Arg2486*  | 0.00000 | 0.00133 |
| 11 | 108,202,168 | TAG          | T         | ATM | c.7519_7520delGA         | p.Asp2507fs | 0.00000 | 0.00399 |
| 11 | 108,203,577 | CTTATA       | C         | ATM | c.7886_7890delTATTA      | p.Ile2629fs | 0.05045 | 0.01064 |
| 11 | 108,204,611 | A            | G         | ATM | c.7928-2A>G              |             | 0.00000 | 0.00266 |
| 11 | 108,214,064 | ATTTTCAGTGCC | A         | ATM | c.8395_8404delTTTCAGTGCC | p.Phe2799fs | 0.00000 | 0.00133 |
| 11 | 108,216,476 | CA           | C         | ATM | c.8432delA               | p.Lys2811fs | 0.00000 | 0.00266 |

(continued)

(continued)

|    |             |       |    |       |                    |              |         |         |
|----|-------------|-------|----|-------|--------------------|--------------|---------|---------|
| 11 | 108,216,545 | C     | T  | ATM   | c.8494C>T          | p.Arg2832Cys | 0.00000 | 0.00133 |
| 11 | 108,216,633 | T     | C  | ATM   | c.8582T>C          | p.Ile2861Thr | 0.00000 | 0.00399 |
| 11 | 108,224,608 | G     | C  | ATM   | c.8786+1G>C        |              | 0.00000 | 0.00133 |
| 11 | 108,236,086 | C     | T  | ATM   | c.9022C>T          | p.Arg3008Cys | 0.00000 | 0.00133 |
| 11 | 108,236,176 | C     | T  | ATM   | c.9112C>T          | p.Gln3038*   | 0.00000 | 0.00133 |
| 12 | 58,145,064  | C     | CA | CDK4  | c.279dupT          | p.Glu94fs    | 0.00000 | 0.00133 |
| 13 | 32,893,464  | T     | C  | BRCA2 | c.316+2T>C         |              | 0.00000 | 0.00133 |
| 13 | 32,906,627  | GC    | G  | BRCA2 | c.1013delC         | p.Ala338fs   | 0.02527 | 0.00000 |
| 13 | 32,906,769  | AG    | A  | BRCA2 | c.1156delG         | p.Glu386fs   | 0.00000 | 0.00133 |
| 13 | 32,906,799  | G     | A  | BRCA2 | c.1184G>A          | p.Trp395*    | 0.00000 | 0.00133 |
| 13 | 32,906,876  | C     | T  | BRCA2 | c.1261C>T          | p.Gln421*    | 0.00000 | 0.00133 |
| 13 | 32,907,014  | A     | T  | BRCA2 | c.1399A>T          | p.Lys467*    | 0.00000 | 0.00133 |
| 13 | 32,907,420  | GA    | G  | BRCA2 | c.1813delA         | p.Ile605fs   | 0.07568 | 0.00399 |
| 13 | 32,911,293  | GT    | G  | BRCA2 | c.2802delT         | p.Asp935fs   | 0.00000 | 0.00133 |
| 13 | 32,911,724  | GT    | G  | BRCA2 | c.3235delT         | p.Ser1079fs  | 0.00000 | 0.00133 |
| 13 | 32,911,969  | CAG   | C  | BRCA2 | c.3481_3482delGA   | p.Asp1161fs  | 0.00000 | 0.00133 |
| 13 | 32,912,089  | CTG   | C  | BRCA2 | c.3599_3600delGT   | p.Cys1200fs  | 0.02523 | 0.00266 |
| 13 | 32,912,770  | A     | AT | BRCA2 | c.4284dupT         | p.Gln1429fs  | 0.00000 | 0.00133 |
| 13 | 32,912,830  | TG    | T  | BRCA2 | c.4339delG         | p.Val1447fs  | 0.00000 | 0.00133 |
| 13 | 32,912,964  | TGAAA | T  | BRCA2 | c.4478_4481delAAAG | p.Glu1493fs  | 0.00000 | 0.00133 |
| 13 | 32,913,138  | AAG   | A  | BRCA2 | c.4649_4650delAG   | p.Glu1550fs  | 0.00000 | 0.00133 |
| 13 | 32,913,295  | T     | TA | BRCA2 | c.4808dupA         | p.Asn1603fs  | 0.00000 | 0.00133 |
| 13 | 32,913,314  | G     | T  | BRCA2 | c.4822G>T          | p.Glu1608*   | 0.00000 | 0.00133 |
| 13 | 32,913,359  | C     | T  | BRCA2 | c.4867C>T          | p.Gln1623*   | 0.00000 | 0.00133 |

(continued)

(continued)

|    |            |        |    |       |                      |              |         |         |
|----|------------|--------|----|-------|----------------------|--------------|---------|---------|
| 13 | 32,913,391 | CTT    | C  | BRCA2 | c.4903_4904delTT     | p.Leu1635fs  | 0.02523 | 0.00000 |
| 13 | 32,913,442 | TC     | T  | BRCA2 | c.4952delC           | p.Pro1651fs  | 0.00000 | 0.00266 |
| 13 | 32,913,558 | C      | CA | BRCA2 | c.5073dupA           | p.Trp1692fs  | 0.00000 | 0.00133 |
| 13 | 32,913,970 | CATTAA | C  | BRCA2 | c.5482_5486delAAAATT | p.Lys1828fs  | 0.00000 | 0.00266 |
| 13 | 32,914,065 | CAATT  | C  | BRCA2 | c.5576_5579delTTAA   | p.Ile1859fs  | 0.02523 | 0.00532 |
| 13 | 32,914,127 | G      | T  | BRCA2 | c.5635G>T            | p.Glu1879*   | 0.00000 | 0.00133 |
| 13 | 32,914,137 | C      | A  | BRCA2 | c.5645C>A            | p.Ser1882*   | 0.00000 | 0.00532 |
| 13 | 32,914,209 | ACT    | A  | BRCA2 | c.5722_5723delCT     | p.Leu1908fs  | 0.00000 | 0.00399 |
| 13 | 32,914,893 | ATAACT | A  | BRCA2 | c.6405_6409delCTTAA  | p.Asn2135fs  | 0.00000 | 0.00665 |
| 13 | 32,915,043 | AG     | A  | BRCA2 | c.6553delG           | p.Ala2185fs  | 0.00000 | 0.00133 |
| 13 | 32,918,775 | A      | T  | BRCA2 | c.6922A>T            | p.Lys2308*   | 0.02599 | 0.00134 |
| 13 | 32,918,778 | AG     | A  | BRCA2 | c.6926delG           | p.Ser2309fs  | 0.02599 | 0.00000 |
| 13 | 32,920,978 | C      | T  | BRCA2 | c.6952C>T            | p.Arg2318*   | 0.02523 | 0.01330 |
| 13 | 32,930,609 | C      | T  | BRCA2 | c.7480C>T            | p.Arg2494*   | 0.00000 | 0.00133 |
| 13 | 32,937,362 | A      | G  | BRCA2 | c.8023A>G            | p.Ile2675Val | 0.00000 | 0.00266 |
| 13 | 32,937,479 | C      | T  | BRCA2 | c.8140C>T            | p.Gln2714*   | 0.00000 | 0.00133 |
| 13 | 32,954,009 | C      | T  | BRCA2 | c.9076C>T            | p.Gln3026*   | 0.00000 | 0.00399 |
| 13 | 32,954,050 | G      | A  | BRCA2 | c.9117G>A            | p.Pro3039Pro | 0.00000 | 0.00133 |
| 13 | 32,968,951 | C      | T  | BRCA2 | c.9382C>T            | p.Arg3128*   | 0.00000 | 0.00133 |
| 13 | 32,971,182 | G      | T  | BRCA2 | c.9648+1G>T          |              | 0.00000 | 0.00133 |
| 13 | 32,972,710 | TC     | T  | BRCA2 | c.10061delC          | p.Ser3354fs  | 0.00000 | 0.00133 |
| 13 | 32,972,711 | CT     | C  | BRCA2 | c.10062delT          | p.Gly3355fs  | 0.00000 | 0.00532 |
| 13 | 32,972,800 | C      | T  | BRCA2 | c.10150C>T           | p.Arg3384*   | 0.05045 | 0.01197 |
| 13 | 32,972,867 | AAAAT  | A  | BRCA2 | c.10220_10223delATAA | p.Asn3407fs  | 0.00000 | 0.00133 |

(continued)

(continued)

|    |            |        |    |              |                    |            |         |         |
|----|------------|--------|----|--------------|--------------------|------------|---------|---------|
| 16 | 23,619,279 | G      | A  | <i>PALB2</i> | c.3256C>T          | p.Arg1086* | 0.00000 | 0.00133 |
| 16 | 23,635,328 | A      | G  | <i>PALB2</i> | c.2834+2T>C        |            | 0.00000 | 0.00266 |
| 16 | 23,635,333 | ATCTC  | A  | <i>PALB2</i> | c.2827_2830delGAGA | p.Glu943fs | 0.00000 | 0.00133 |
| 16 | 23,637,576 | TAA    | T  | <i>PALB2</i> | c.2727_2728delTT   | p.Thr911fs | 0.00000 | 0.00133 |
| 16 | 23,640,993 | ATG    | A  | <i>PALB2</i> | c.2480_2481delCA   | p.Thr827fs | 0.00000 | 0.00133 |
| 16 | 23,641,004 | CA     | C  | <i>PALB2</i> | c.2470delT         | p.Cys824fs | 0.00000 | 0.00133 |
| 16 | 23,641,239 | CT     | C  | <i>PALB2</i> | c.2235delA         | p.Ala746fs | 0.00000 | 0.00133 |
| 16 | 23,641,684 | CA     | C  | <i>PALB2</i> | c.1790delT         | p.Met597fs | 0.02523 | 0.00000 |
| 16 | 23,646,192 | GAATA  | G  | <i>PALB2</i> | c.1671_1674delTATT | p.Ile558fs | 0.00000 | 0.00266 |
| 16 | 23,646,234 | C      | A  | <i>PALB2</i> | c.1633G>T          | p.Glu545*  | 0.00000 | 0.00133 |
| 16 | 23,646,415 | TA     | T  | <i>PALB2</i> | c.1451delT         | p.Leu484fs | 0.00000 | 0.00399 |
| 16 | 23,646,483 | C      | A  | <i>PALB2</i> | c.1384G>T          | p.Glu462*  | 0.00000 | 0.00133 |
| 16 | 23,646,627 | G      | A  | <i>PALB2</i> | c.1240C>T          | p.Arg414*  | 0.00000 | 0.00266 |
| 16 | 23,647,027 | G      | GA | <i>PALB2</i> | c.839_840insT      | p.Ile281fs | 0.00000 | 0.00133 |
| 16 | 23,647,117 | TAAAGG | T  | <i>PALB2</i> | c.745_749delCCTTT  | p.Pro249fs | 0.00000 | 0.00133 |
| 16 | 23,647,568 | AG     | A  | <i>PALB2</i> | c.298delC          | p.Asp101fs | 0.02523 | 0.00000 |
| 16 | 23,649,450 | AC     | A  | <i>PALB2</i> | c.49-1delG         |            | 0.00000 | 0.00133 |
| 16 | 68,845,757 | C      | T  | <i>CDH1</i>  | c.1003C>T          | p.Arg335*  | 0.00000 | 0.00133 |
| 16 | 68,855,902 | A      | T  | <i>CDH1</i>  | c.1712-2A>T        |            | 0.00000 | 0.00399 |
| 16 | 68,857,426 | CTG    | C  | <i>CDH1</i>  | c.2064_2065delITG  | p.Cys688fs | 0.00000 | 0.00133 |
| 17 | 29,486,027 | G      | C  | <i>NF1</i>   | c.205-1G>C         |            | 0.00000 | 0.00133 |
| 17 | 29,496,923 | CTG    | C  | <i>NF1</i>   | c.496_497delGT     | p.Val166fs | 0.00000 | 0.00133 |
| 17 | 29,509,525 | G      | C  | <i>NF1</i>   | c.731-1G>C         |            | 0.00000 | 0.00133 |
| 17 | 29,533,378 | C      | T  | <i>NF1</i>   | c.1381C>T          | p.Arg461*  | 0.00000 | 0.00133 |

(continued)

(continued)

|    |            |                      |     |               |                                   |             |         |         |
|----|------------|----------------------|-----|---------------|-----------------------------------|-------------|---------|---------|
| 17 | 29,552,152 | G                    | A   | <i>NF1</i>    | c.1885G>A                         | p.Gly629Arg | 0.00000 | 0.00133 |
| 17 | 29,553,477 | A                    | AC  | <i>NF1</i>    | c.2033dupC                        | p.Ile679fs  | 0.00000 | 0.00133 |
| 17 | 29,556,173 | T                    | C   | <i>NF1</i>    | c.2540T>C                         | p.Leu847Pro | 0.00000 | 0.00133 |
| 17 | 29,556,889 | C                    | T   | <i>NF1</i>    | c.2887C>T                         | p.Gln963*   | 0.00000 | 0.00133 |
| 17 | 29,559,825 | TGA                  | T   | <i>NF1</i>    | c.3424_3425delAG                  | p.Arg1142fs | 0.00000 | 0.00133 |
| 17 | 29,560,189 | TATAGCGATGGCTCTGGCCA | T   | <i>NF1</i>    | c.3669_3687delAGCGATGGCTCTGGCCAAT | p.Ile1223fs | 0.00000 | 0.00133 |
| 17 | 29,562,935 | G                    | C   | <i>NF1</i>    | c.3871-1G>C                       |             | 0.00000 | 0.00133 |
| 17 | 29,563,003 | A                    | AT  | <i>NF1</i>    | c.3940dupT                        | p.Trp1314fs | 0.00000 | 0.00133 |
| 17 | 29,587,535 | T                    | G   | <i>NF1</i>    | c.4577+2T>G                       |             | 0.00000 | 0.00133 |
| 17 | 29,588,751 | C                    | T   | <i>NF1</i>    | c.4600C>T                         | p.Arg1534*  | 0.00000 | 0.00133 |
| 17 | 29,663,441 | GA                   | G   | <i>NF1</i>    | c.6098delA                        | p.Asp2033fs | 0.00000 | 0.00133 |
| 17 | 29,665,757 | C                    | A   | <i>NF1</i>    | c.6855C>A                         | p.Tyr2285*  | 0.00000 | 0.00133 |
| 17 | 29,679,298 | G                    | A   | <i>NF1</i>    | c.7481G>A                         | p.Trp2494*  | 0.00000 | 0.00133 |
| 17 | 33,428,018 | C                    | T   | <i>RAD51D</i> | c.1001G>A                         | p.Trp334*   | 0.02523 | 0.00133 |
| 17 | 33,428,057 | T                    | A   | <i>RAD51D</i> | c.964-2A>T                        |             | 0.12614 | 0.06650 |
| 17 | 33,428,225 | G                    | A   | <i>RAD51D</i> | c.958C>T                          | p.Arg320*   | 0.00000 | 0.00133 |
| 17 | 33,428,256 | GC                   | G   | <i>RAD51D</i> | c.926delG                         | p.Gly309fs  | 0.00000 | 0.00133 |
| 17 | 33,428,376 | GT                   | G   | <i>RAD51D</i> | c.806delA                         | p.Asn269fs  | 0.00000 | 0.00133 |
| 17 | 33,430,317 | G                    | A   | <i>RAD51D</i> | c.754C>T                          | p.Arg252*   | 0.00000 | 0.00399 |
| 17 | 33,433,406 | TG                   | T   | <i>RAD51D</i> | c.634delC                         | p.Gln212fs  | 0.00000 | 0.00133 |
| 17 | 33,434,006 | C                    | A   | <i>RAD51D</i> | c.540+1G>T                        |             | 0.02523 | 0.00000 |
| 17 | 33,434,458 | T                    | TTA | <i>RAD51D</i> | c.330_331dupTA                    | p.Lys111fs  | 0.05045 | 0.06251 |
| 17 | 33,443,877 | C                    | T   | <i>RAD51D</i> | c.323+1G>A                        |             | 0.02523 | 0.00000 |
| 17 | 33,443,903 | G                    | A   | <i>RAD51D</i> | c.298C>T                          | p.Arg100*   | 0.00000 | 0.00399 |

(continued)

(continued)

|    |            |        |       |               |                     |              |         |         |
|----|------------|--------|-------|---------------|---------------------|--------------|---------|---------|
| 17 | 33,444,017 | G      | A     | <i>RAD51D</i> | c.184C>T            | p.Gln62*     | 0.02523 | 0.01064 |
| 17 | 33,446,128 | A      | AC    | <i>RAD51D</i> | c.144+1dupG         |              | 0.00000 | 0.00798 |
| 17 | 41,197,729 | T      | C     | <i>BRCA1</i>  | c.5621A>G           | p.Tyr1874Cys | 0.02523 | 0.00000 |
| 17 | 41,203,135 | C      | G     | <i>BRCA1</i>  | c.5341-1G>C         |              | 0.00000 | 0.00133 |
| 17 | 41,215,382 | G      | A     | <i>BRCA1</i>  | c.5224C>T           | p.Gln1742*   | 0.00000 | 0.00133 |
| 17 | 41,215,389 | C      | A     | <i>BRCA1</i>  | c.5217G>T           | p.Trp1739Cys | 0.02523 | 0.00133 |
| 17 | 41,215,947 | C      | T     | <i>BRCA1</i>  | c.5159G>A           | p.Arg1720Gln | 0.00000 | 0.00399 |
| 17 | 41,219,665 | ATTAG  | A     | <i>BRCA1</i>  | c.5093_5096delCTAA  | p.Thr1698fs  | 0.00000 | 0.00133 |
| 17 | 41,222,974 | C      | A     | <i>BRCA1</i>  | c.5020G>T           | p.Val1674Leu | 0.00000 | 0.00399 |
| 17 | 41,234,439 | G      | GTTCT | <i>BRCA1</i>  | c.4335_4338dupAGAA  | p.Gln1447fs  | 0.00000 | 0.00133 |
| 17 | 41,243,024 | ACT    | A     | <i>BRCA1</i>  | c.4120_4121delAG    | p.Ser1374fs  | 0.02523 | 0.00000 |
| 17 | 41,244,004 | G      | A     | <i>BRCA1</i>  | c.3544C>T           | p.Gln1182*   | 0.02523 | 0.00133 |
| 17 | 41,244,085 | C      | CT    | <i>BRCA1</i>  | c.3462dupA          | p.Asp1155fs  | 0.02523 | 0.00000 |
| 17 | 41,244,683 | TGATAG | T     | <i>BRCA1</i>  | c.2860_2864delCTATC | p.Leu954fs   | 0.00000 | 0.00133 |
| 17 | 41,245,157 | TTC    | T     | <i>BRCA1</i>  | c.2389_2390delGA    | p.Glu797fs   | 0.05045 | 0.00266 |
| 17 | 41,247,917 | G      | A     | <i>BRCA1</i>  | c.616C>T            | p.Gln206*    | 0.00000 | 0.00133 |
| 17 | 41,251,881 | CTG    | C     | <i>BRCA1</i>  | c.456_457delCA      | p.Ser153fs   | 0.00000 | 0.00133 |
| 17 | 41,258,497 | A      | T     | <i>BRCA1</i>  | c.188T>A            | p.Leu63*     | 0.02523 | 0.01064 |
| 17 | 41,267,797 | C      | T     | <i>BRCA1</i>  | c.81-1G>A           |              | 0.00000 | 0.00133 |
| 17 | 46,804,161 | AGC    | A     | <i>HOXB13</i> | c.844_845delGC      | p.Ala282fs   | 0.00000 | 0.00133 |
| 17 | 46,804,231 | T      | TG    | <i>HOXB13</i> | c.775dupC           | p.Gln259fs   | 0.00000 | 0.00133 |
| 17 | 46,804,243 | A      | AGGCT | <i>HOXB13</i> | c.760_763dupAGCC    | p.Leu255fs   | 0.00000 | 0.00133 |
| 17 | 46,804,374 | G      | T     | <i>HOXB13</i> | c.633C>A            | p.Cys211*    | 0.00000 | 0.00133 |
| 17 | 46,805,371 | C      | T     | <i>HOXB13</i> | c.585G>A            | p.Trp195*    | 0.00000 | 0.00665 |

(continued)



(continued)

|    |            |     |       |               |                    |                  |         |         |
|----|------------|-----|-------|---------------|--------------------|------------------|---------|---------|
| 17 | 56,770,005 | A   | G     | <i>RAD51C</i> | c.1A>G             | p.Met1?          | 0.00000 | 0.00133 |
| 17 | 56,770,117 | T   | TCCTA | <i>RAD51C</i> | c.114_117dupCCTA   | p.Glu40fs        | 0.00000 | 0.00266 |
| 17 | 56,772,291 | G   | C     | <i>RAD51C</i> | c.146-1G>C         |                  | 0.00000 | 0.00133 |
| 17 | 56,787,313 | C   | T     | <i>RAD51C</i> | c.799C>T           | p.Gln267*        | 0.00000 | 0.00133 |
| 17 | 56,787,352 | G   | C     | <i>RAD51C</i> | c.837+1G>C         |                  | 0.00000 | 0.00266 |
| 17 | 56,801,399 | A   | C     | <i>RAD51C</i> | c.905-2A>C         |                  | 0.00000 | 0.00133 |
| 17 | 56,801,460 | AG  | A     | <i>RAD51C</i> | c.965+1delG        |                  | 0.00000 | 0.00266 |
| 17 | 56,809,844 | G   | T     | <i>RAD51C</i> | c.966-1G>T         |                  | 0.00000 | 0.00133 |
| 17 | 56,811,477 | A   | G     | <i>RAD51C</i> | c.1027-2A>G        |                  | 0.00000 | 0.00266 |
| 17 | 56,811,581 | T   | C     | <i>RAD51C</i> | c.1129T>C          | p.Ter377Glnext*? | 0.00000 | 0.00133 |
| 17 | 59,761,166 | C   | CA    | <i>BRIP1</i>  | c.3240dupT         | p.Ala1081fs      | 0.00000 | 0.03059 |
| 17 | 59,761,334 | AC  | A     | <i>BRIP1</i>  | c.3072delG         | p.Ser1025fs      | 0.00000 | 0.00399 |
| 17 | 59,763,271 | TG  | T     | <i>BRIP1</i>  | c.2830delC         | p.Gln944fs       | 0.00000 | 0.00133 |
| 17 | 59,763,275 | C   | CACAT | <i>BRIP1</i>  | c.2823_2826dupATGT | p.Val943fs       | 0.00000 | 0.00133 |
| 17 | 59,770,807 | TG  | T     | <i>BRIP1</i>  | c.2558delC         | p.Pro853fs       | 0.00000 | 0.00133 |
| 17 | 59,770,849 | C   | T     | <i>BRIP1</i>  | c.2517G>A          | p.Trp839*        | 0.00000 | 0.00133 |
| 17 | 59,770,874 | C   | G     | <i>BRIP1</i>  | c.2493-1G>C        |                  | 0.00000 | 0.00133 |
| 17 | 59,793,412 | G   | A     | <i>BRIP1</i>  | c.2392C>T          | p.Arg798*        | 0.00000 | 0.00133 |
| 17 | 59,821,795 | TTC | T     | <i>BRIP1</i>  | c.2253_2254delGA   | p.Lys752fs       | 0.00000 | 0.00266 |
| 17 | 59,853,764 | T   | A     | <i>BRIP1</i>  | c.2095A>T          | p.Lys699*        | 0.00000 | 0.00133 |
| 17 | 59,853,779 | AAC | A     | <i>BRIP1</i>  | c.2078_2079delGT   | p.Cys693fs       | 0.00000 | 0.00133 |
| 17 | 59,858,220 | CA  | C     | <i>BRIP1</i>  | c.1774delT         | p.Trp592fs       | 0.00000 | 0.00133 |
| 17 | 59,861,674 | C   | A     | <i>BRIP1</i>  | c.1585G>T          | p.Gly529*        | 0.00000 | 0.00266 |
| 17 | 59,876,486 | G   | A     | <i>BRIP1</i>  | c.1315C>T          | p.Arg439*        | 0.00000 | 0.00266 |

(continued)

(continued)

|    |             |                       |    |              |                                     |             |         |         |
|----|-------------|-----------------------|----|--------------|-------------------------------------|-------------|---------|---------|
| 17 | 59,876,594  | GA                    | G  | <i>BRIP1</i> | c.1206delT                          | p.Arg403fs  | 0.00000 | 0.00133 |
| 17 | 59,878,688  | G                     | A  | <i>BRIP1</i> | c.1066C>T                           | p.Arg356*   | 0.00000 | 0.00133 |
| 17 | 59,878,769  | G                     | A  | <i>BRIP1</i> | c.985C>T                            | p.Gln329*   | 0.00000 | 0.00266 |
| 17 | 59,886,067  | G                     | A  | <i>BRIP1</i> | c.679C>T                            | p.Gln227*   | 0.00000 | 0.00133 |
| 17 | 59,926,513  | G                     | A  | <i>BRIP1</i> | c.484C>T                            | p.Arg162*   | 0.00000 | 0.00133 |
| 17 | 59,934,454  | GGTGGTGT              | G  | <i>BRIP1</i> | c.337_343delACACCAC                 | p.Thr113fs  | 0.00000 | 0.00133 |
| 17 | 59,934,577  | T                     | TC | <i>BRIP1</i> | c.220dupG                           | p.Glu74fs   | 0.00000 | 0.00133 |
| 17 | 59,938,877  | A                     | C  | <i>BRIP1</i> | c.24T>G                             | p.Tyr8*     | 0.00000 | 0.00133 |
| 17 | 7,577,022   | G                     | A  | <i>TP53</i>  | c.916C>T                            | p.Arg306*   | 0.02523 | 0.00000 |
| 17 | 7,577,025   | T                     | A  | <i>TP53</i>  | c.913A>T                            | p.Lys305*   | 0.00000 | 0.00133 |
| 17 | 7,577,120   | C                     | T  | <i>TP53</i>  | c.818G>A                            | p.Arg273His | 0.02524 | 0.00266 |
| 17 | 7,577,121   | G                     | A  | <i>TP53</i>  | c.817C>T                            | p.Arg273Cys | 0.02523 | 0.00000 |
| 17 | 7,577,548   | C                     | T  | <i>TP53</i>  | c.733G>A                            | p.Gly245Ser | 0.00000 | 0.00133 |
| 17 | 7,577,550   | C                     | T  | <i>TP53</i>  | c.731G>A                            | p.Gly244Asp | 0.00000 | 0.00133 |
| 17 | 7,577,551   | C                     | T  | <i>TP53</i>  | c.730G>A                            | p.Gly244Ser | 0.00000 | 0.00266 |
| 17 | 7,578,190   | T                     | C  | <i>TP53</i>  | c.659A>G                            | p.Tyr220Cys | 0.00000 | 0.00133 |
| 17 | 7,578,406   | C                     | T  | <i>TP53</i>  | c.524G>A                            | p.Arg175His | 0.00000 | 0.00133 |
| 17 | 7,578,552   | G                     | C  | <i>TP53</i>  | c.378C>G                            | p.Tyr126*   | 0.00000 | 0.00133 |
| 18 | 48,581,364  | G                     | C  | <i>SMAD4</i> | c.667+1G>C                          |             | 0.00000 | 0.00266 |
| 18 | 48,593,475  | TACAGAGTTACTACTTAG    | T  | <i>SMAD4</i> | c.1233_1249delTTACTACTTAGACAGAG     | p.Ser411fs  | 0.00000 | 0.00133 |
| 19 | 1,218,501   | T                     | A  | <i>STK11</i> | c.374+2T>A                          |             | 0.00000 | 0.00133 |
| 19 | 1,223,153   | C                     | T  | <i>STK11</i> | c.1090C>T                           | p.Gln364*   | 0.00000 | 0.00133 |
| 2  | 215,595,181 | TCATACTTTTCTTCCTGTTCA | T  | <i>BARD1</i> | c.1935_1954delITGAACAGGAAGAAAAGTATG | p.Cys645fs  | 0.00000 | 0.00399 |
| 2  | 215,595,232 | CCT                   | C  | <i>BARD1</i> | c.1904-2_1904-1delAG                |             | 0.00000 | 0.00133 |

(continued)

(continued)

|   |             |              |        |              |                         |             |         |         |
|---|-------------|--------------|--------|--------------|-------------------------|-------------|---------|---------|
| 2 | 215,609,790 | C            | G      | <i>BARD1</i> | c.1903+1G>C             |             | 0.00000 | 0.00133 |
| 2 | 215,610,445 | C            | A      | <i>BARD1</i> | c.1810+1G>T             |             | 0.00000 | 0.00133 |
| 2 | 215,634,006 | G            | A      | <i>BARD1</i> | c.1345C>T               | p.Gln449*   | 0.00000 | 0.00399 |
| 2 | 215,645,568 | TG           | T      | <i>BARD1</i> | c.1029delC              | p.Ser344fs  | 0.00000 | 0.00133 |
| 2 | 215,645,711 | T            | TC     | <i>BARD1</i> | c.886dupG               | p.Glu296fs  | 0.00000 | 0.00532 |
| 2 | 215,645,764 | G            | GACTTC | <i>BARD1</i> | c.829_833dupGAAGT       | p.Ser279fs  | 0.00000 | 0.00133 |
| 2 | 215,645,862 | GT           | G      | <i>BARD1</i> | c.735delA               | p.Gln245fs  | 0.00000 | 0.00133 |
| 2 | 215,645,865 | G            | A      | <i>BARD1</i> | c.733C>T                | p.Gln245*   | 0.02523 | 0.00000 |
| 2 | 215,646,150 | G            | A      | <i>BARD1</i> | c.448C>T                | p.Arg150*   | 0.00000 | 0.00133 |
| 2 | 215,646,170 | ATTGAATTCTTC | A      | <i>BARD1</i> | c.417_427delGAAGAATTCAA | p.Lys139fs  | 0.00000 | 0.00133 |
| 2 | 215,661,843 | T            | G      | <i>BARD1</i> | c.159-2A>C              |             | 0.00000 | 0.00133 |
| 2 | 47,596,680  | GC           | G      | <i>EPCAM</i> | c.37delC                | p.Ala14fs   | 0.00000 | 0.00133 |
| 2 | 47,600,600  | A            | G      | <i>EPCAM</i> | c.77-2A>G               |             | 0.00000 | 0.00133 |
| 2 | 47,600,609  | CTG          | C      | <i>EPCAM</i> | c.87_88delTG            | p.Cys29fs   | 0.00000 | 0.00133 |
| 2 | 47,600,691  | AC           | A      | <i>EPCAM</i> | c.167delC               | p.Thr56fs   | 0.00000 | 0.00133 |
| 2 | 47,600,704  | C            | G      | <i>EPCAM</i> | c.179C>G                | p.Ser60*    | 0.00000 | 0.00133 |
| 2 | 47,601,074  | C            | CT     | <i>EPCAM</i> | c.315dupT               | p.Lys106fs  | 0.02523 | 0.00133 |
| 2 | 47,601,174  | C            | T      | <i>EPCAM</i> | c.412C>T                | p.Arg138*   | 0.00000 | 0.00133 |
| 2 | 47,602,439  | G            | A      | <i>EPCAM</i> | c.491+1G>A              |             | 0.00000 | 0.00133 |
| 2 | 47,630,331  | A            | G      | <i>MSH2</i>  | c.1A>G                  | p.Met1?     | 0.00000 | 0.00133 |
| 2 | 47,630,332  | T            | C      | <i>MSH2</i>  | c.2T>C                  | p.Met1?     | 0.00000 | 0.00133 |
| 2 | 47,643,513  | C            | CT     | <i>MSH2</i>  | c.1023dupT              | p.Val342fs  | 0.02523 | 0.00000 |
| 2 | 47,710,051  | T            | TA     | <i>MSH2</i>  | c.2771dupA              | p.Asn924fs  | 0.00000 | 0.00133 |
| 2 | 48,026,231  | T            | C      | <i>MSH6</i>  | c.1109T>C               | p.Leu370Ser | 0.00000 | 0.00133 |

(continued)

(continued)

|    |            |              |    |              |                              |              |         |         |
|----|------------|--------------|----|--------------|------------------------------|--------------|---------|---------|
| 2  | 48,026,310 | CTA          | C  | <i>MSH6</i>  | c.1190_1191delAT             | p.Tyr397fs   | 0.00000 | 0.00133 |
| 2  | 48,026,932 | GA           | G  | <i>MSH6</i>  | c.1813delA                   | p.Thr605fs   | 0.00000 | 0.00133 |
| 2  | 48,027,853 | C            | T  | <i>MSH6</i>  | c.2731C>T                    | p.Arg911*    | 0.00000 | 0.00133 |
| 2  | 48,027,872 | AC           | A  | <i>MSH6</i>  | c.2752delC                   | p.His918fs   | 0.00000 | 0.00133 |
| 2  | 48,027,886 | C            | T  | <i>MSH6</i>  | c.2764C>T                    | p.Arg922*    | 0.00000 | 0.00133 |
| 2  | 48,028,225 | C            | T  | <i>MSH6</i>  | c.3103C>T                    | p.Arg1035*   | 0.00000 | 0.00133 |
| 2  | 48,030,612 | C            | T  | <i>MSH6</i>  | c.3226C>T                    | p.Arg1076Cys | 0.00000 | 0.00665 |
| 2  | 48,032,120 | TG           | T  | <i>MSH6</i>  | c.3511delG                   | p.Asp1171fs  | 0.00000 | 0.00133 |
| 2  | 48,032,123 | T            | TA | <i>MSH6</i>  | c.3514dupA                   | p.Arg1172fs  | 0.00000 | 0.00133 |
| 2  | 48,032,167 | G            | T  | <i>MSH6</i>  | c.3556+1G>T                  |              | 0.00000 | 0.00133 |
| 2  | 48,033,789 | CG           | C  | <i>MSH6</i>  | c.4001+1delG                 |              | 0.00000 | 0.00133 |
| 22 | 29,083,909 | TG           | T  | <i>CHEK2</i> | c.1736delC                   | p.Pro579fs   | 0.00000 | 0.00133 |
| 22 | 29,083,949 | CG           | C  | <i>CHEK2</i> | c.1696delC                   | p.Arg566fs   | 0.00000 | 0.00133 |
| 22 | 29,083,962 | G            | A  | <i>CHEK2</i> | c.1684C>T                    | p.Arg562*    | 0.00000 | 0.02660 |
| 22 | 29,099,490 | TA           | T  | <i>CHEK2</i> | c.1037+2delT                 |              | 0.00000 | 0.00133 |
| 22 | 29,099,555 | C            | A  | <i>CHEK2</i> | c.976-1G>T                   |              | 0.00000 | 0.00133 |
| 22 | 29,099,555 | CTAAGAAGAGGG | C  | <i>CHEK2</i> | c.976-12_976-2delCCCTCTTCTTA |              | 0.00000 | 0.00266 |
| 22 | 29,099,556 | TA           | CC | <i>CHEK2</i> | c.976-3_976-2delTAinsGG      |              | 0.00000 | 0.00133 |
| 22 | 29,107,896 | C            | T  | <i>CHEK2</i> | c.921+1G>A                   |              | 0.00000 | 0.00133 |
| 22 | 29,108,006 | C            | T  | <i>CHEK2</i> | c.813-1G>A                   |              | 0.00000 | 0.00133 |
| 22 | 29,121,091 | AAG          | A  | <i>CHEK2</i> | c.593_594delCT               | p.Ser198fs   | 0.02537 | 0.00000 |
| 22 | 29,121,242 | G            | A  | <i>CHEK2</i> | c.562C>T                     | p.Arg188Trp  | 0.00000 | 0.00133 |
| 22 | 29,121,266 | G            | A  | <i>CHEK2</i> | c.538C>T                     | p.Arg180*    | 0.00000 | 0.00266 |
| 22 | 29,130,427 | G            | A  | <i>CHEK2</i> | c.283C>T                     | p.Arg95*     | 0.00000 | 0.00399 |

(continued)

(continued)

|   |             |        |       |             |                     |             |         |         |
|---|-------------|--------|-------|-------------|---------------------|-------------|---------|---------|
| 3 | 37,053,590  | G      | A     | <i>MLH1</i> | c.677G>A            | p.Arg226Gln | 0.00000 | 0.00133 |
| 3 | 37,059,065  | AAC    | A     | <i>MLH1</i> | c.866_867delAC      | p.His289fs  | 0.00000 | 0.00133 |
| 5 | 112,090,589 | T      | TG    | <i>APC</i>  | c.4dupG             | p.Ala2fs    | 0.00000 | 0.00133 |
| 5 | 112,090,657 | C      | T     | <i>APC</i>  | c.70C>T             | p.Arg24*    | 0.00000 | 0.00133 |
| 5 | 112,154,771 | C      | T     | <i>APC</i>  | c.1042C>T           | p.Arg348*   | 0.00000 | 0.00133 |
| 7 | 6,031,649   | G      | A     | <i>PMS2</i> | c.943C>T            | p.Arg315*   | 0.00000 | 0.00931 |
| 7 | 6,035,203   | ACTGT  | A     | <i>PMS2</i> | c.861_864delACAG    | p.Arg287fs  | 0.00000 | 0.00266 |
| 7 | 6,038,908   | T      | C     | <i>PMS2</i> | c.538-2A>G          |             | 0.00000 | 0.00532 |
| 7 | 6,042,221   | G      | A     | <i>PMS2</i> | c.400C>T            | p.Arg134*   | 0.00000 | 0.00133 |
| 7 | 6,043,612   | C      | A     | <i>PMS2</i> | c.241G>T            | p.Glu81*    | 0.00000 | 0.00133 |
| 7 | 6,045,630   | TCAATA | T     | <i>PMS2</i> | c.51_55delTATTG     | p.Ile18fs   | 0.00000 | 0.00133 |
| 7 | 6,048,649   | A      | G     | <i>PMS2</i> | c.2T>C              | p.Met1?     | 0.00000 | 0.00133 |
| 8 | 90,949,273  | GA     | G     | <i>NBN</i>  | c.2214delT          | p.Ala740fs  | 0.02523 | 0.00000 |
| 8 | 90,949,282  | C      | A     | <i>NBN</i>  | c.2206G>T           | p.Glu736*   | 0.00000 | 0.04788 |
| 8 | 90,955,492  | GCCTTA | G     | <i>NBN</i>  | c.2168_2172delTAAGG | p.Leu723fs  | 0.00000 | 0.00133 |
| 8 | 90,960,121  | C      | T     | <i>NBN</i>  | c.1846-1G>A         |             | 0.00000 | 0.00133 |
| 8 | 90,965,600  | C      | A     | <i>NBN</i>  | c.1717G>T           | p.Glu573*   | 0.00000 | 0.00133 |
| 8 | 90,965,793  | T      | TA    | <i>NBN</i>  | c.1523dupT          | p.Ser509fs  | 0.00000 | 0.00266 |
| 8 | 90,967,511  | C      | CT    | <i>NBN</i>  | c.1396dupA          | p.Arg466fs  | 0.00000 | 0.00133 |
| 8 | 90,982,591  | C      | T     | <i>NBN</i>  | c.896+1G>A          |             | 0.00000 | 0.00133 |
| 8 | 90,982,653  | G      | A     | <i>NBN</i>  | c.835C>T            | p.Gln279*   | 0.00000 | 0.00133 |
| 8 | 90,983,400  | C      | T     | <i>NBN</i>  | c.702+1G>A          |             | 0.00000 | 0.00133 |
| 8 | 90,993,658  | G      | A     | <i>NBN</i>  | c.265C>T            | p.Arg89*    | 0.00000 | 0.00399 |
| 8 | 90,993,742  | C      | CTGTT | <i>NBN</i>  | c.177_180dupAACA    | p.Asp61fs   | 0.00000 | 0.00133 |

(continued)

(continued)

|   |            |   |   |               |          |           |         |         |
|---|------------|---|---|---------------|----------|-----------|---------|---------|
| 8 | 90,994,994 | G | A | <i>NBN</i>    | c.127C>T | p.Arg43*  | 0.00000 | 0.00133 |
| 9 | 21,968,762 | C | A | <i>CDKN2A</i> | c.466G>T | p.Gly156* | 0.00000 | 0.00266 |
| 9 | 21,974,825 | A | T | <i>CDKN2A</i> | c.2T>A   | p.Met1?   | 0.00000 | 0.00133 |

---
